# Supplementary material
Source: PubMed Central journal article supplement (PMC3012984)
Supplement: supp_M110.174102_jbc.M110.174102-1.pdf [file supp_M110.174102_jbc.M110.174102-1.pdf]

## Supplementary Information

### Supplementary Figures

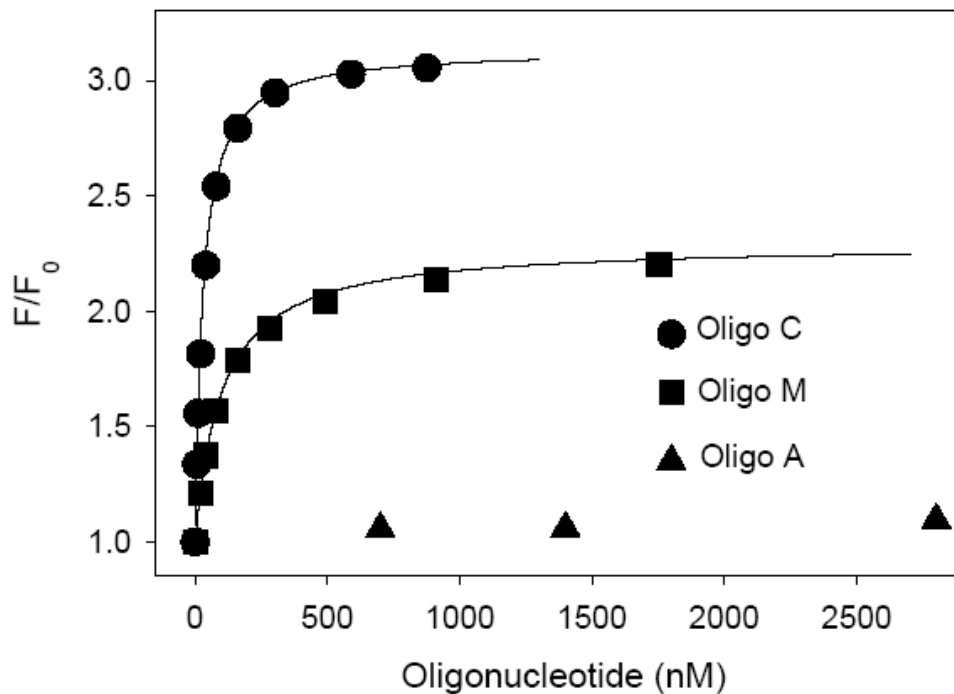

**Figure S1. Representative data for the quantification of ss oligo binding to holo RNAP using the beacon assay.**

Titration of [211Cys-TMR]  $\sigma^{70}$  holoenzyme RNAP with oligos C, M, A. Sequences of oligos C, M, A are: 5' -ATTGGGTATAATTGACTCA, 5' -ATTGGGCATAATTGACTCA and 5' -ATTGGGATCTCGTGACTCA, respectively, with the -10 element in larger letters.

The solid lines correspond to a nonlinear regression fit of the data to Eq. 1.

A

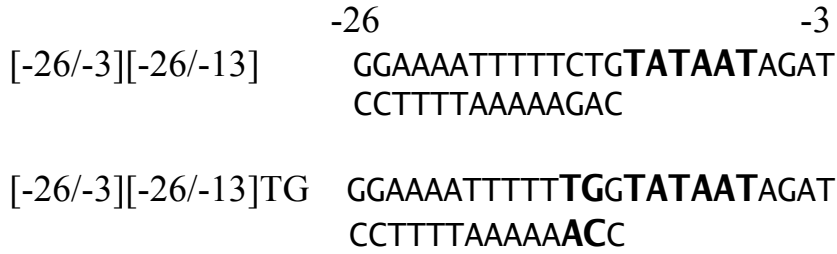

B

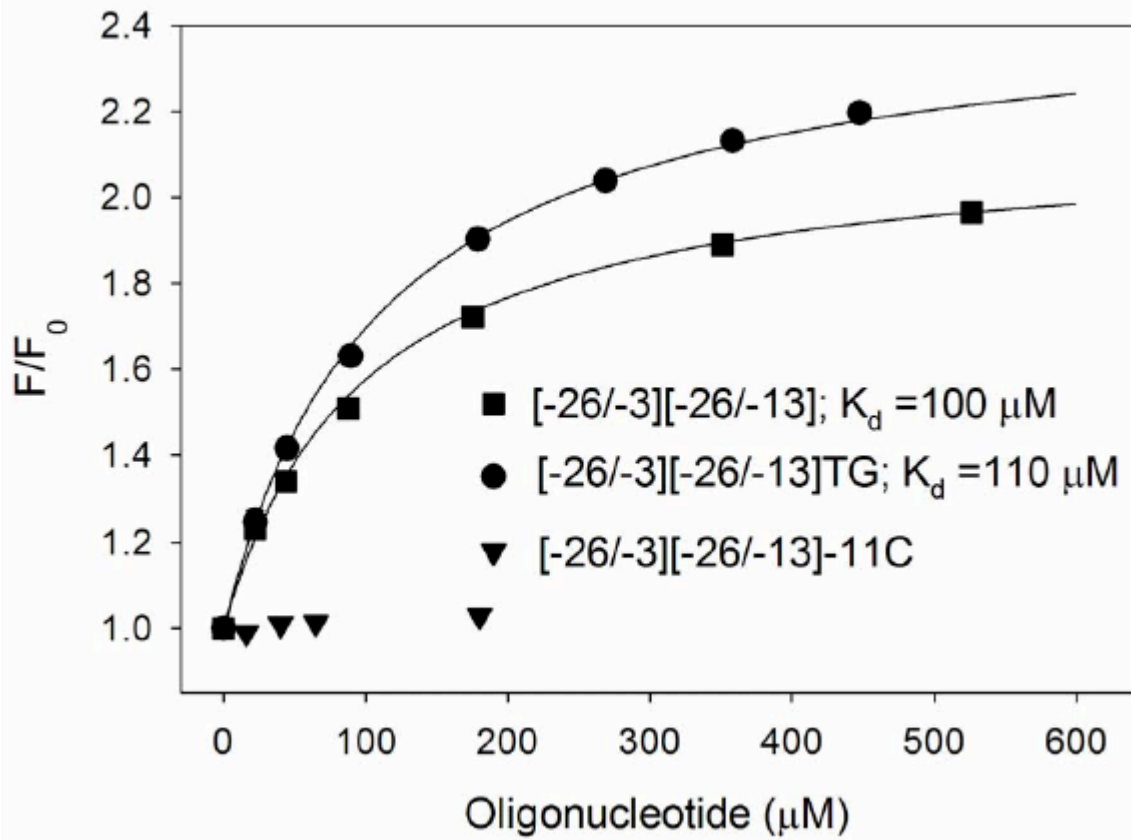

**Figure S2. Binding of a fork junction DNA probes to free  $\sigma^{70}$  measured using protein beacon assay.** (A) Sequence of fork junction probes with the consensus -10 element and the TG motif sequences highlighted in larger size font. (B) Titration of free [211Cys-TMR]  $\sigma^{70}$  with [-26/-3][-26/-13], [-26/-3][-26/-13]TG and a derivative of [-26/-3][-26/-12] bearing a substitution from A to C at -11. The solid lines correspond to a nonlinear regression fit of the data to Eq. 1.

**A**

-58      UP element                      -35 element                      -14

[-58/-14]      GCTAAAATTTTTTTTTTAAAAGTATTTGACATCAGGAAAATTTTTTTG  
CGATTTTAAAAAAATTTTCATAAACTGTAGTCCTTTTAAAAAAC

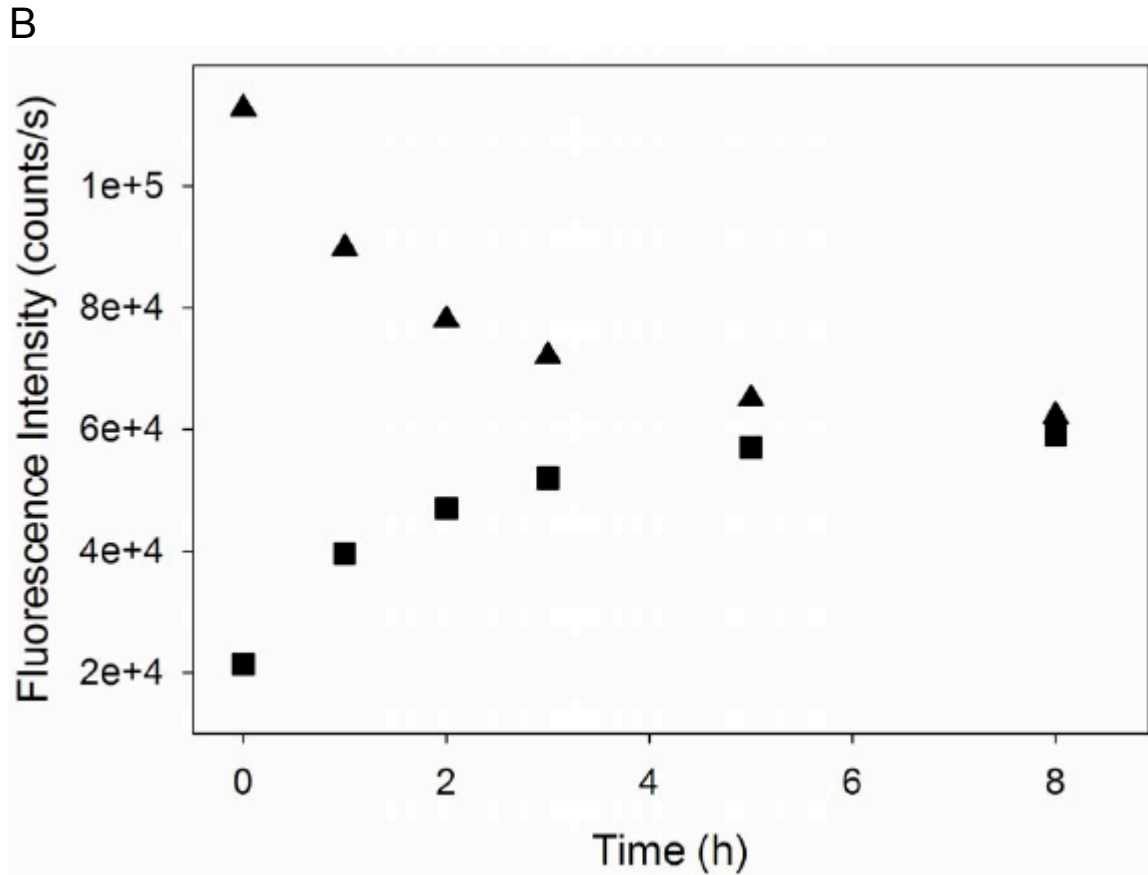

**Figure S3. A competition assay measures RNAP binding to fork junction DNA probe.** (A) Sequence of a reference competitor probe [-58-14]. (B) An order of addition experiment reveals that competition assay for RNAP binding to [-38/-3][-38/-12];-35mut fork junction reaches equilibrium.

Two samples containing both 1nM [211Cys-TMR]  $\sigma^{70}$  RNAP and either 2nM [-38/-3][-38/-12];-35mut (sample #1) or 4 nM [-58/-14] (sample #2) were incubated for 40 m. Then 4 nM [-58-14] and 2nM [-38/-3][-38/-12];-35mut were added to the samples #1 and

#2, respectively, and fluorescence intensity of the samples was monitored (triangles and squares, respectively).

## Supplementary Table

**Table S1. Binding of holoRNAP to Oligonucleotides C and M.**

| RNAP derivative                 | $K_d$ (C), nM | $K_d$ (M), nM | $K_d(M)/K_d(C)$ |
|---------------------------------|---------------|---------------|-----------------|
| RNAP-( $\sigma$ -211-TMR)       | 28.8          | 100           | 3.5             |
| RNAP-( $\sigma$ -211-BODIPY FL) | 6.2           | 25.8          | 4.2             |
| RNAP-( $\sigma$ -192-TMR)       | 13.8          | 55.3          | 4               |
| <sup>a</sup> wt RNAP            | 3             | 15            | 5               |

The  $K_d$  for RNAP beacons are from 2-3 individual experiments, the error is  $\pm 15\%$ .

<sup>a</sup>The data for wt RNAP are from (Marr, Roberts, Cell 1996).
